# Supplementary material for: Mimicking normal tissue architecture and perturbation in cancer with engineered micro-epidermis
Source: PubMed Central journal article supplement (PMC3437971; doi:10.1016/j.biomaterials.2012.04.009), 2012-07
Supplement: mmc4.pdf [file mmc4.pdf]

# Mimicking Normal Tissue Architecture and Perturbation in Cancer with Engineered Micro- Epidermis

*Julien E. Gautrot,<sup>1,2,3</sup> Chunming Wang,<sup>1,2</sup> Xin Liu,<sup>1</sup> Stephen J. Goldie,<sup>4</sup> Britta Trappmann,<sup>1</sup>  
Wilhelm T. S. Huck<sup>1,5\*</sup> and Fiona M. Watt<sup>2,4\*</sup>*

<sup>1</sup> Melville Laboratory for Polymer Synthesis, Department of Chemistry, University of  
Cambridge, Lensfield Road, Cambridge, CB2 1EW, UK.

<sup>2</sup> Wellcome Trust Centre for Stem Cell Research, University of Cambridge, Tennis Court  
Road, Cambridge, CB2 1RE, UK.

<sup>3</sup> School of Engineering and Materials Science, Queen Mary, University of London, Mile End  
Road, London, E1 4NS, UK.

<sup>4</sup> Cancer Research UK Cambridge Research Institute, Li Ka Shing Centre, Robinson Way,  
Cambridge, CB2 0RE, UK.

<sup>5</sup> Radboud University Nijmegen, Institute for Molecules and Materials, Heyendaalseweg 135,  
6525 AJ Nijmegen, The Netherlands.

\* To whom correspondence should be addressed E-mail: [fiona.watt@cancer.org.uk](mailto:fiona.watt@cancer.org.uk),  
[w.huck@science.ru.nl](mailto:w.huck@science.ru.nl).

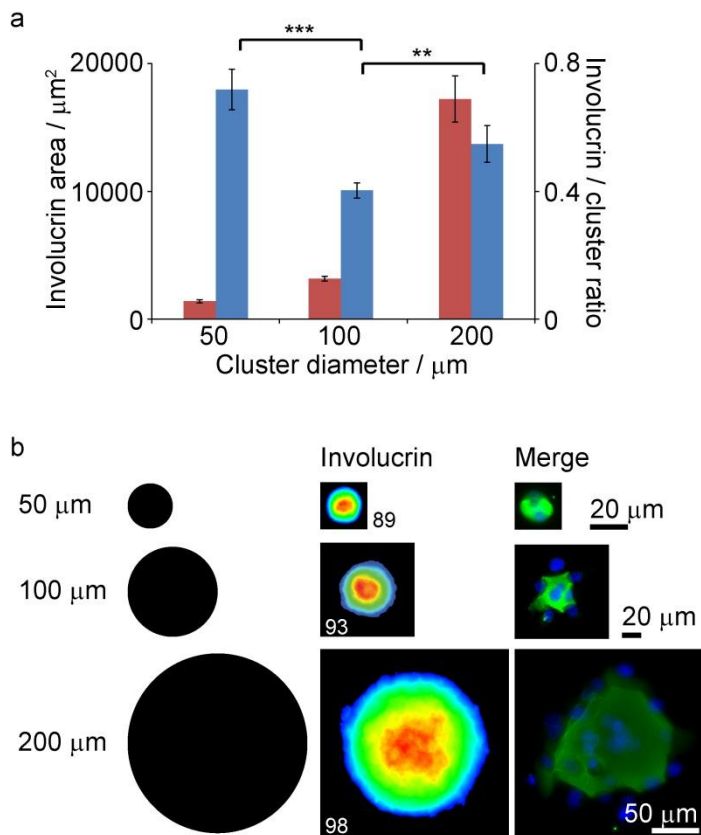

**Supplementary Figure 1.** Impact of collagen island diameter on cell segregation. Undifferentiated keratinocytes adhered to collagen I disks of varying size (50, 100 and 200  $\mu\text{m}$  in diameter) for 24h before fixation and immuno-staining. (a) Involucrin areas (red) and ratios of involucrin areas to total cluster areas (blue) extracted from heatmaps. \*\*  $P < 0.05$ ; \*\*\*  $P < 0.01$ ; error bars are s.e.m.,  $n \geq 3$ . (b) Single collagen island size (left column), heatmaps (middle) and single cluster images (right; involucrin, green; DAPI, blue). Numbers at the bottom left of heatmaps (for 100 and 200  $\mu\text{m}$  islands and on the right next to the heatmap of a 50  $\mu\text{m}$  island) are the number of images overlayed. These results show that for islands of smaller diameters (50  $\mu\text{m}$ ), the ratios of involucrin area to total island area markedly increased. Larger adhesive islands (200  $\mu\text{m}$ ) displayed normal architecture, but ratios increased modestly compared to 100  $\mu\text{m}$  islands.

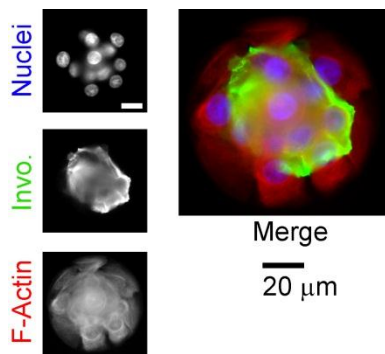

**Supplementary Figure 2.** Micro-epidermis displaying cell-peripheral involucrin staining. Undifferentiated keratinocytes were allowed to adhere to collagen discs for 24 h before fixation and staining for involucrin. Involucrin expressed by the differentiated cell in the centre of the cluster is confined to the cell periphery, a feature of the later stages of epidermal differentiation.

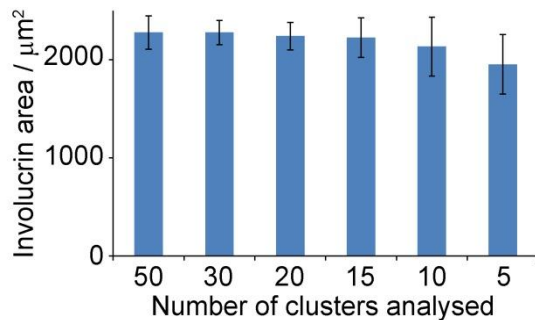

**Supplementary Figure 3.** Impact of the number of clusters analysed to generate heatmaps. Undifferentiated keratinocytes were allowed to adhere to collagen rings ( $40 \mu\text{m}$  non-adhesive patch) for 24 h before fixation and staining for involucrin. Images of the resulting clusters (100 in total) were randomly grouped in image sets composed of varying numbers (5-50; the “50” group contained only two sets). For each set of images, a heatmap was generated and the corresponding involucrin area measured, which was plotted against the number of images used for each image set. Error bars are s.e.m.,  $n \geq 3$  for  $N = 5-30$  and  $n = 2$  for  $N = 50$ .

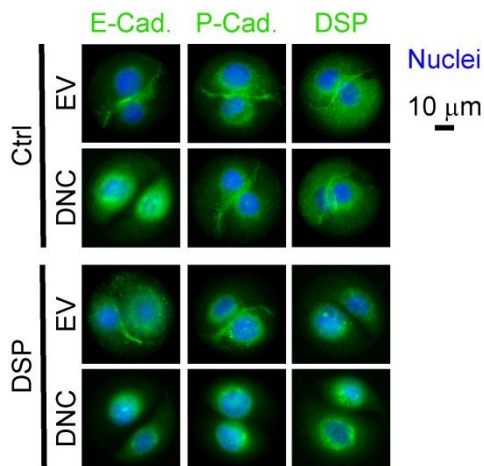

**Supplementary Figure 4.** Effect on cell-cell junction composition of expressing dominant negative E-cadherin (DNC) and DSP siRNA. EV and DNC keratinocytes were treated with non-silencing (Ctrl) and desmoplakin (DSP) siRNAs. Cells were cultured on 50  $\mu\text{m}$  collagen discs in FAD for 24h before fixation and staining for E- and P-cadherin as well as DSP. Only islands displaying 2 cells are shown so that cells present comparable interfaces.

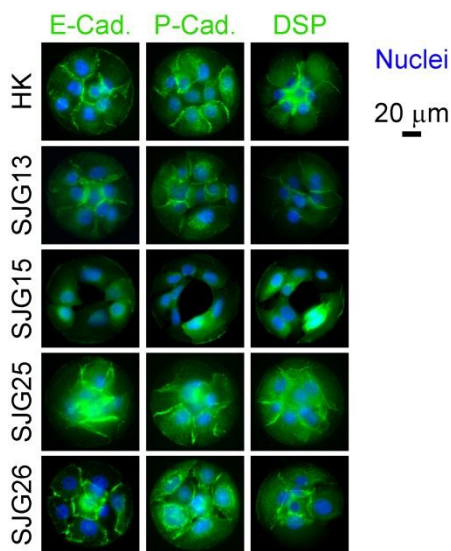

**Supplementary Figure 5.** Composition of the intercellular junctions of normal keratinocytes and SCC cells. Cancer cells were allowed to adhere to collagen rings (40  $\mu\text{m}$  non-adhesive patch) for 24h before fixation and immuno-staining. Representative single cluster images (E-cadherin, P-cadherin and DSP, green; DAPI, blue).

**Supplementary Video 1.** Undifferentiated HEKs were seeded on a collagen I ring (40  $\mu\text{m}$  non adhesive patch) and imaged using live DIC microscopy in complete FAD medium. Acquisition started 2h after seeding, every 10 min. Image width: 105  $\mu\text{m}$ . 10 frames/s.

**Supplementary Video 2.** Undifferentiated HEKs were seeded on a collagen I ring (40  $\mu\text{m}$  non adhesive patch) and imaged using live DIC microscopy in complete FAD medium containing blebbistatin (3  $\mu\text{M}$ ). Acquisition started 2h after seeding, every 10 min. Blebbistatin was added just before starting imaging. Image width: 105  $\mu\text{m}$ . 10 frames/s.
